# Supplementary material
Source: Springer Nature journal article supplement (https://www.springermedizin.de/resource/supplementary/12990_2011_384_MOESM8_ESM.pdf/9613166)

**A****Mechanical sensitivity**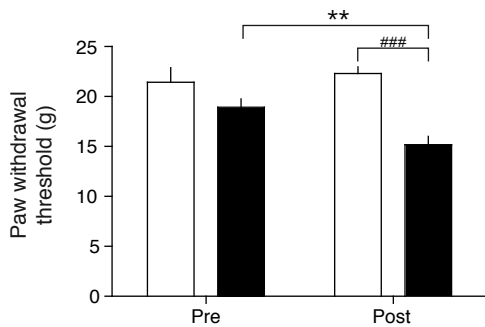

Control  
Silenced

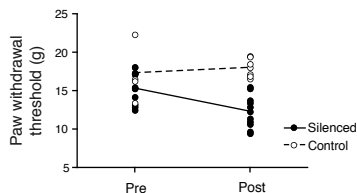**B****Thermal sensitivity**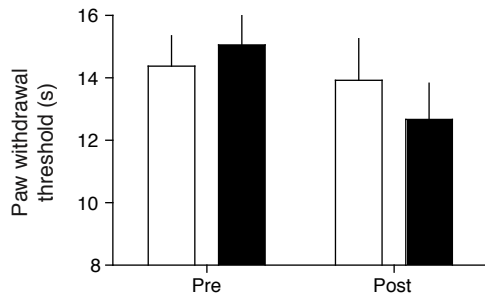

Control  
Silenced

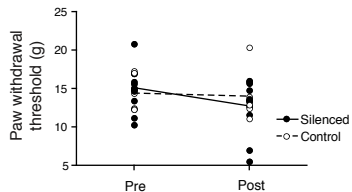

Supplement: MOESM8 [file 9613166]
